# Supplementary material for: Electronic structure and photoluminescence properties of single component white emitting Sr3LuNa(PO4)3F:Eu2+,Mn2+ phosphor for WLEDs
Source: Royal Society of Chemistry journal article supplement (doi:10.1039/c8tc00224j), 2018-01-01
Supplement: c8tc00224j1.pdf [file c8tc00224j1.pdf]

## **Supplementary Information**

**Title:** Electronic structure and photoluminescence properties of single component white emitting  $\text{Sr}_3\text{LuNa}(\text{PO}_4)_3\text{F}:\text{Eu}^{2+},\text{Mn}^{2+}$  phosphor for WLEDs

**Author(s):** Mengmeng Jiao<sup>a</sup>, Qinfeng Xu<sup>a</sup>, Chuanlu Yang<sup>a\*</sup> and Mingliang Liu<sup>a</sup>

<sup>a</sup>School of Physics and Optoelectronic Engineering, Ludong University, Yantai 264025, China.

Corresponding author: E-mail: ycl@ldu.edu.cn

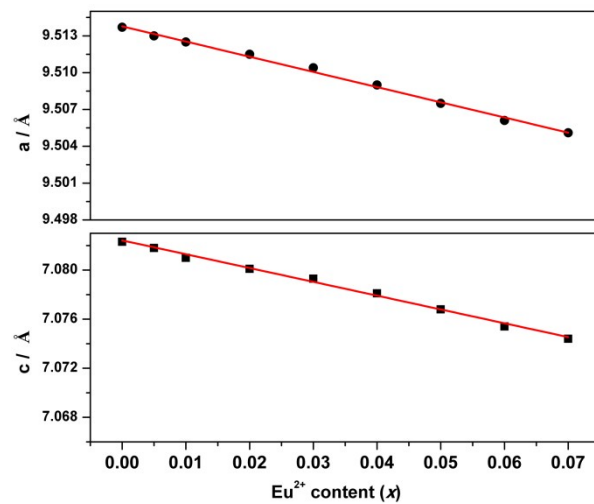

Fig. S1. Dependence of lattice parameters  $a$  and  $c$  on doping content of  $\text{Eu}^{2+}$  for  $\text{SLuNPF}:x\text{Eu}^{2+}$  samples.

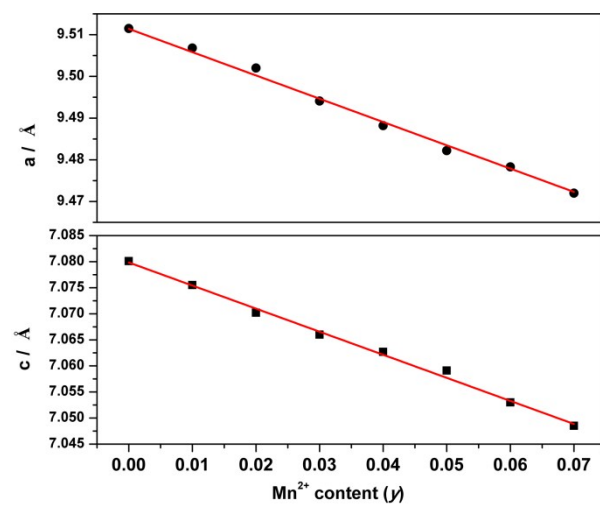

Fig. S2. Dependence of lattice parameters  $a$  and  $c$  as on  $\text{Mn}^{2+}$  doping content for  $\text{SLuNPF}:0.02\text{Eu}^{2+},y\text{Mn}^{2+}$  samples.

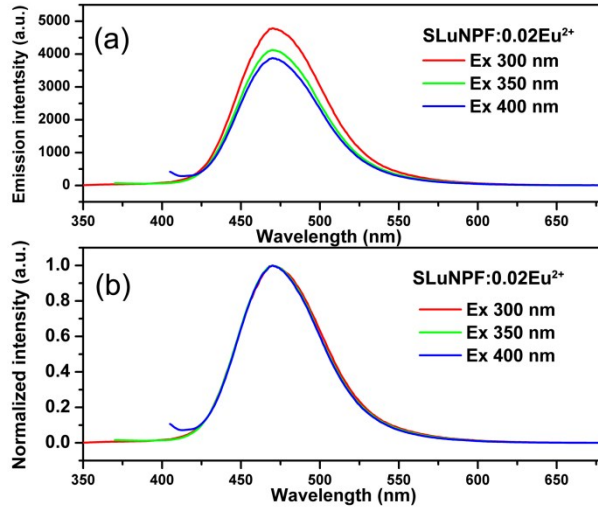

Fig. S3. (a) Emission spectra of SLuNPF:0.02Eu<sup>2+</sup> under different excitation.

(b) Normalized emission spectra of SLuNPF:0.02Eu<sup>2+</sup> under different excitation.

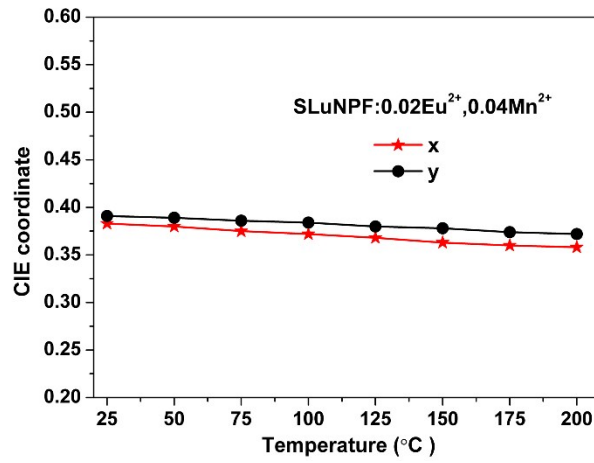

Fig. S4. CIE coordinates of SLuNPF:0.02Eu<sup>2+</sup>,0.04Mn<sup>2+</sup> phosphor at different temperatures.
